# Supplementary material for: A novel diamine non-aqueous absorbent based on N-methyl diethanolamine regulation for energy-efficient CO2 capture
Source: Royal Society of Chemistry journal article supplement (doi:10.1039/d3re00506b), 2023-11-29
Supplement: d3re00506b1.pdf [file d3re00506b1.pdf]

# **A Novel Diamine Non-Aqueous Absorbent Based on N-methyl diethanolamine**

## **Regulation for Energy-efficient CO<sub>2</sub> Capture**

Zhen Wang<sup>a</sup>, Zhitao Han<sup>a,\*</sup>, Xiao Yang<sup>a</sup>, Zelu Zhou<sup>a</sup>, Xi Wu<sup>a</sup>, Song Zhou<sup>b</sup>, Shijian Lu<sup>c</sup>

a. Marine Engineering College, Dalian Maritime University, Dalian 116026, China.

b. Power and Energy Engineering College, Harbin Engineering University, Harbin 150001, China;

c. Carbon Neutral Institute, China University of Mining and Technology, Xuzhou 221008, China;

Correspondence information: Dr. Zhitao Han, Dalian Maritime University, No.1, Linghai Road,

Dalian 116026, China, [hanzt@dlmu.edu.cn](mailto:hanzt@dlmu.edu.cn), ORCID: 0000-0001-5501-6067, Tel: +86 138 9869

2035.

### **1. Schematic diagram of CO<sub>2</sub> desorption setup**

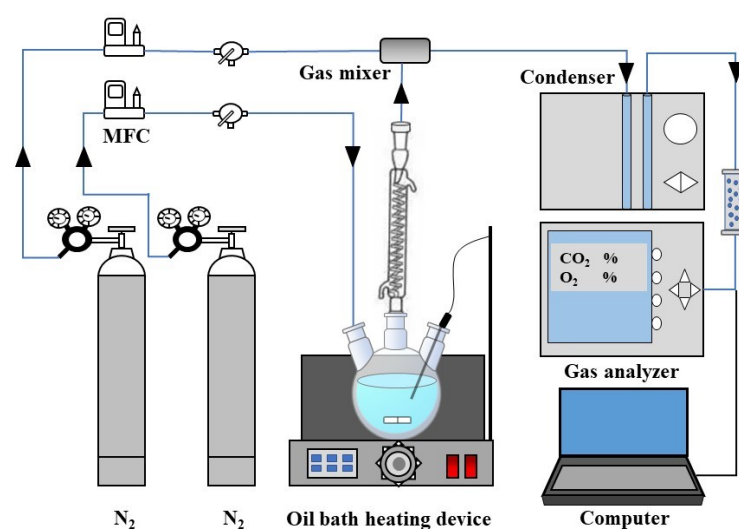

Fig. S1. Schematic diagram of CO<sub>2</sub> desorption setup.

## 2. Different non-aqueous absorbent systems.

Table. S1. Different MEA/MDEA/PEG200 non-aqueous absorbent systems.

| No. | Solvent                                      | Abbreviation |
|-----|----------------------------------------------|--------------|
| 1   | 30 wt.% MEA, 70 wt.% PEG200                  | 30M/P        |
| 2   | 25 wt.% MEA, 5 wt.% MDEA, 70 wt.% PEG200     | 25M5M/P      |
| 3   | 22.5 wt.% MEA, 7.5 wt.% TEA, 70 wt.% PEG200  | 22.5M7.5M/P  |
| 4   | 20 wt.% MEA, 10 wt.% TEA, 70 wt.% PEG200     | 20M10M/P     |
| 5   | 17.5 wt.% MEA, 12.5 wt.% TEA, 70 wt.% PEG200 | 17.5M12.5M/P |
| 5   | 15 wt.% MEA, 15 wt.% TEA, 70 wt.% PEG200     | 15M15M/P     |

3

## 3. Cyclic CO<sub>2</sub> absorption-desorption capacity of MEA/MDEA/PEG200 system

It could be seen from Fig. S2. that 20 MEA/10 MDEA/70 PEG200 showed good CO<sub>2</sub>

capture capacity in 8 cycles absorption and desorption experiments.

7

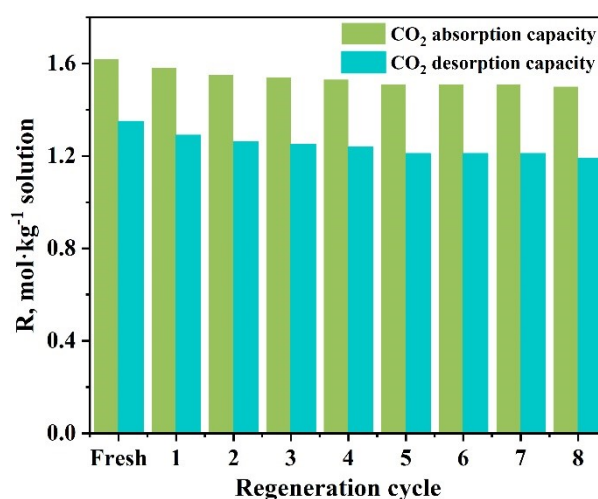

8

Fig. S2. Cyclic CO<sub>2</sub> absorption-desorption capacity of MEA/MDEA/PEG200

system.

10

1  $(V_L = 0.05 \text{ kg}, C_{MEA} = 20 \text{ wt.}\%, C_{MDEA} = 10 \text{ wt.}\%, C_{PEG200} = 70 \text{ wt.}\%, T_{absorption} =$   
2  $313 \text{ K}, T_{desorption} = 393 \text{ K}).$

### 3 4. Vapor-liquid equilibrium (VLE) data of different absorbents

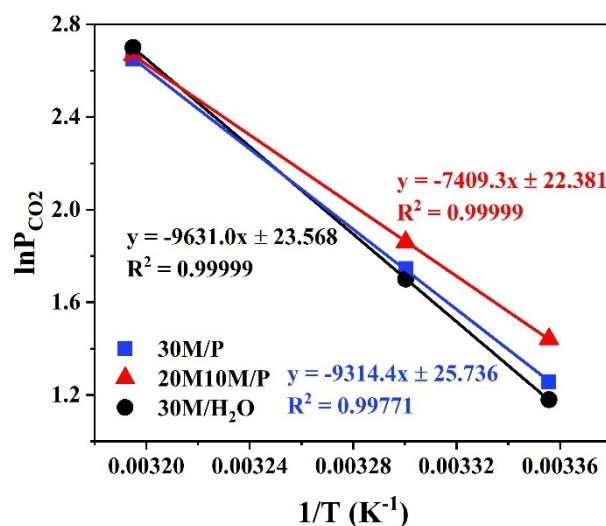

4  
5 Fig. S3. Vapor-liquid equilibrium (VLE) data of different absorbents.

### 6 5. Comparison of the viscosity of different non-aqueous absorbents

7 Table. S2. Comparison of the viscosity of different non-aqueous absorbents

| Regulator | Absorbent    | Viscosity, mPa·s |                                |
|-----------|--------------|------------------|--------------------------------|
|           |              | Fresh solution   | CO <sub>2</sub> -rich solution |
| /         | 30M/P        | 25.6             | 456.60                         |
| DEA       | 25M5D/P      | 30.6             | 535.70                         |
| TEA       | 25M5T/P      | 42.5             | 483.50                         |
| MDEA      | 25M5M/P      | 27.2             | 303.20                         |
| MDEA      | 22.5M7.5M/P  | 30.5             | 242.60                         |
| MDEA      | 20M10M/P     | 32.6             | 182.50                         |
| MDEA      | 17.5M12.5M/P | 35.7             | 145.60                         |
| MDEA      | 15M15M/P     | 38.2             | 113.70                         |

8  
9 In non-aqueous absorbent viscosity tests, it was found that the viscosity of  
10 MEA/MDEA/PEG200 absorbent after CO<sub>2</sub> absorption decreased with increased

1 MDEA mass fraction. It might be attributed to two factors. On the one hand, it is due  
2 to the fact that all non-aqueous absorbents keep at a constant total amine concentration,  
3 and an increase in the mass fraction of MDEA will result in a decrease in MEA  
4 concentration. Since MEA played a major CO<sub>2</sub> absorption role in diamine non-aqueous  
5 absorbents. Thus, a decrease in MEA concentration results in a decrease in CO<sub>2</sub>  
6 absorption products, which reduces the viscosity of diamine non-aqueous absorbents.  
7 On the other hand, the viscosity of absorbent is related to the hydrogen bonding  
8 generated between carbamate and protonated amine. While MDEA is not introduced in  
9 MEA, CO<sub>2</sub> absorption products of MEA/PEG200 absorbent are primary amine  
10 carbamate and protonated MEA. The primary amine carbamate and protonated MEA  
11 have a relatively high stability and can result in a large number of stable hydrogen  
12 bonds, which keeps the viscosity of CO<sub>2</sub>-rich absorbent at a high level. It can be noticed  
13 by <sup>13</sup>C NMR that the addition of MDEA can change the type of protonated amine in  
14 non-aqueous absorbent, and generate more protonated MDEA rather than protonated  
15 MEA. Compared with protonated MEA, protonated MDEA has a relatively weaker  
16 stability. Therefore, the hydrogen bonds formed between it and carbamate have a  
17 weaker stability, which results in a lower viscosity of CO<sub>2</sub>-rich absorbents.  
18

## 1 6. CO<sub>2</sub> absorption and desorption performance of 30M/H<sub>2</sub>O system.

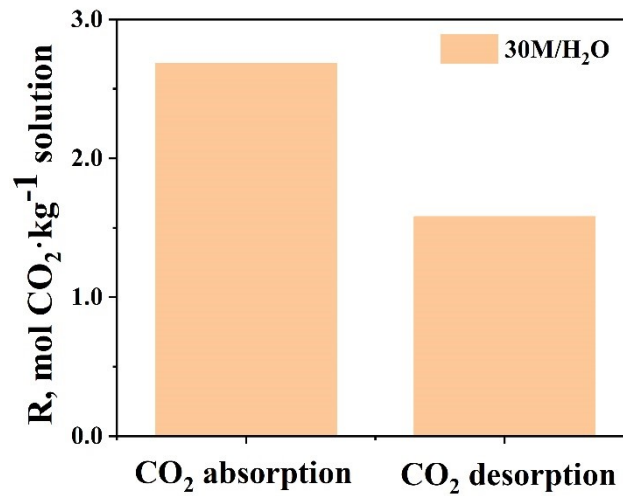

2  
3 Fig. S4. CO<sub>2</sub> absorption and desorption performance of 30M/P system.

4 ( $V_L = 0.05$  kg,  $C_{total} = 30$  wt.%,  $T_{absorption} = 313$  K,  $T_{desorption} = 373$  K).

5 The results showed that CO<sub>2</sub> absorption capacity of 30 wt.% MEA aqueous solution  
6 reached 2.62 mol/kg, CO<sub>2</sub> desorption capacity reached 1.52 mol/kg, and CO<sub>2</sub>  
7 desorption efficiency was only 58 %. In addition to these, the regeneration energy  
8 consumption of 30 wt.% MEA aqueous solution was as high as 3.66 GJ/ton CO<sub>2</sub> by  
9 thermodynamic analysis.

10

## 7. Physicochemical properties of various components.

Table. S3. Physicochemical properties of various components.

| Component       | $C_p$ , $\text{kJ}\cdot\text{K}^{-1}\cdot\text{kg}^{-1}$ | $\Delta H_{\text{sol}}^{\text{vap}}(T_R)$ , $\text{kJ}\cdot\text{kg}^{-1}$ , 393 K |
|-----------------|----------------------------------------------------------|------------------------------------------------------------------------------------|
| Water           | 4.179                                                    | 2194.8                                                                             |
| PEG200          | 2.37                                                     | /                                                                                  |
| MEA             | 3.01                                                     | /                                                                                  |
| MDEA            | 3.59                                                     | /                                                                                  |
| DEA             | /                                                        | /                                                                                  |
| TEA             | /                                                        | /                                                                                  |
| CO <sub>2</sub> | 0.84                                                     | /                                                                                  |

## 8. The mass of CO<sub>2</sub> absorbent, desorbed CO<sub>2</sub> and absorbent loss during regeneration

Table. S4. The mass of CO<sub>2</sub> absorbent, desorbed CO<sub>2</sub> and absorbent loss during regeneration

|                      | $m_{\text{sol}}$ , kg | $m_{\text{CO}_2}$ ,<br>10 <sup>-3</sup> kg | $m_{\text{sol}}^{\text{vap}}$ ,<br>10 <sup>-3</sup> kg | $Q_{\text{lat}}$ , GJ/ton CO <sub>2</sub> |
|----------------------|-----------------------|--------------------------------------------|--------------------------------------------------------|-------------------------------------------|
| 20M10M/P             | 0.103                 | 7.342                                      | 0.192                                                  | 0.06                                      |
| 30M/P                | 0.107                 | 11.205                                     | 0.306                                                  | 0.06                                      |
| 30M/H <sub>2</sub> O | 0.104                 | 12.264                                     | 7.264                                                  | 1.30                                      |

In order to calculate the latent heat of evaporation, it is necessary to determine the mass loss of different adsorbents during regeneration. Thus, the mass loss of adsorbent after regeneration was completed was derived by weighing the mass change of adsorbents before and after desorption. It was found that under the same regeneration conditions, 30 wt.% MEA aqueous solution showed the highest mass loss of 7.264 g. In contrast,

1 MEA/PEG and MEAMDEA/PEG systems showed very low solvent losses of 0.306 g  
2 and 0.192 g, respectively. Therefore, the addition of PEG200 can significantly reduce  
3 the latent heat of evaporation of non-aqueous absorbents compared to MEA aqueous  
4 solutions.
